# Supplementary material for: Effects of Vaping Prevention Messages on Electronic Vapor Product Beliefs, Perceived Harms, and Behavioral Intentions among Young Adults: A Randomized Controlled Trial
Source: MDPI journal article supplement (doi:10.3390/ijerph192114182), 2022-10-30
Supplement: s1 [file s1]

**Figure S1.** Vape education messages (Intervention Condition), PACE Vape Messaging Study, 2020

|      | Alone                                                                                                                                                                                                                                                | +Social                                                                                                                                                                                                            | +Flavor                                                                                                                                                                                                                     |
|------|------------------------------------------------------------------------------------------------------------------------------------------------------------------------------------------------------------------------------------------------------|--------------------------------------------------------------------------------------------------------------------------------------------------------------------------------------------------------------------|-----------------------------------------------------------------------------------------------------------------------------------------------------------------------------------------------------------------------------|
| HARM |  <p><b>Sleek design hides a deadly truth.</b></p> <p><b>Vapes contain ingredients that can cause cancer.</b></p>                                                    |  <p><b>Influencers may make vaping look cool...</b></p> <p><b>But the coughing caused by lung damage? Not a good look.</b></p>   |  <p><b>Sugar and spice and everything nice?</b></p> <p><b>NOPE.</b></p> <p><b>Chemicals in vapes can cause cell and lung damage.</b></p> |
|      |  <p><b>Do you know what you're vaping?</b></p> <p><b>Some vapes have formaldehyde. It can cause problems like asthma or cancer, and mess with your memory.</b></p> |  <p><b>Depression? What a vibe check.</b></p> <p><b>People who keep vaping are more likely to have signs of depression.</b></p> |  <p><b>Trouble breathing?</b></p> <p><b>Vape flavors may cause lung damage.</b></p>                                                     |

|           | Alone | +Social                                                                            | +Flavor                                                                             |
|-----------|-------|------------------------------------------------------------------------------------|-------------------------------------------------------------------------------------|
| ADDICTION |       |  |  |

NOTE: Participants in the intervention condition were exposed to all eight messages.

**Figure S2.** Sun safety messages (Control Condition), PACE Vape Messaging Study, 2020

|                                                                                                                      |                                                                                                                                                             |                                                                                                                          |                                                                                                                                                     |
|----------------------------------------------------------------------------------------------------------------------|-------------------------------------------------------------------------------------------------------------------------------------------------------------|--------------------------------------------------------------------------------------------------------------------------|-----------------------------------------------------------------------------------------------------------------------------------------------------|
| <p><b>Indoor tanning and Ultraviolet (UV) radiation from the sun cause skin cancer and premature aging.</b></p>      | <p><b>In order for the skin to tan - by sun or tanning lamps - the skin has to be damaged.</b></p> <p><b>Tanning is your skin's response to injury.</b></p> | <p><b>UV radiation from the sun is just as strong on cloudy and partly cloudy days.</b></p>                              | <p><b>Indoor tanning beds, booths, and lamps emit UV radiation at much higher levels than typical sunlight.</b></p>                                 |
| <p><b>Conditions such as snow, water, or even reflections off of buildings intensify the sun's UV radiation.</b></p> | <p><b>Wearing sunscreen alone does NOT prevent skin cancer.</b></p>                                                                                         | <p><b>Limit sun exposure, wear protective clothing, and avoid indoor tanning to reduce your risk of skin cancer.</b></p> | <p><b>Sunburns are damaging for all ages. Apply a thick layer of sunscreen with an SPF of 30 or higher to prevent sunburns and skin cancer.</b></p> |

NOTE: Participants in the control condition were exposed to all eight messages.

Table S1. Baseline characteristics of participants retained versus lost to follow-up, PACE Vape Messaging Study, 2020

|                                        | Lost to<br>follow-up<br>n (%) | Retained<br>n (%) | Total<br>n (%) | p-value |
|----------------------------------------|-------------------------------|-------------------|----------------|---------|
| Study condition                        |                               |                   |                | 0.38    |
| Control                                | 30 (53.6)                     | 242 (47.5)        | 272 (48.1)     |         |
| Intervention                           | 26 (46.4)                     | 268 (52.5)        | 294 (51.9)     |         |
| Sex                                    |                               |                   |                | 0.04    |
| Male                                   | 10 (18.2)                     | 160 (31.4)        | 170 (30.1)     |         |
| Female                                 | 45 (81.8)                     | 349 (68.6)        | 394 (69.9)     |         |
| Cis or not cisgender                   |                               |                   |                | 0.12    |
| Cisgender                              | 50 (89.3)                     | 482 (94.5)        | 532 (94)       |         |
| Transgender/don't know/questioning     | 6 (10.7)                      | 28 (5.5)          | 34 (6)         |         |
| Sexual identity                        |                               |                   |                | 0.07    |
| Straight/heterosexual                  | 33 (58.9)                     | 360 (70.6)        | 393 (69.4)     |         |
| Not straight/heterosexual              | 23 (41.1)                     | 150 (29.4)        | 173 (30.6)     |         |
| Race/ethnicity                         |                               |                   |                | 0.02    |
| White                                  | 51 (91.1)                     | 381 (74.7)        | 432 (76.3)     |         |
| Non-white/other                        | 1 (1.8)                       | 50 (9.8)          | 51 (9)         |         |
| Hispanic                               | 4 (7.1)                       | 79 (15.5)         | 83 (14.7)      |         |
| HRSA-Designated rural county           |                               |                   |                | 0.54    |
| No                                     | 29 (55.8)                     | 254 (51.3)        | 283 (51.7)     |         |
| Yes                                    | 23 (44.2)                     | 241 (48.7)        | 264 (48.3)     |         |
| Employment status                      |                               |                   |                | 0.65    |
| Work full-time (35 hours/week or more) | 18 (32.1)                     | 185 (36.3)        | 203 (35.9)     |         |
| Work part-time (15-34 hours/week)      | 16 (28.6)                     | 111 (21.8)        | 127 (22.4)     |         |
| Work part-time (<15 hours/week)        | 10 (17.9)                     | 85 (16.7)         | 95 (16.8)      |         |
| Don't currently work for pay           | 12 (21.4)                     | 129 (25.3)        | 141 (24.9)     |         |
| Subjective financial status            |                               |                   |                | 0.58    |
| Live comfortably                       | 22 (39.3)                     | 172 (33.7)        | 194 (34.3)     |         |
| Meet needs with a little left          | 23 (41.1)                     | 194 (38)          | 217 (38.3)     |         |
| Just meet basic expenses               | 10 (17.9)                     | 132 (25.9)        | 142 (25.1)     |         |
| Don't meet basic expenses              | 1 (1.8)                       | 12 (2.4)          | 13 (2.3)       |         |
| Ever use                               |                               |                   |                |         |

|                                          |           |            |            |      |
|------------------------------------------|-----------|------------|------------|------|
| Cigarettes                               | 28 (50)   | 182 (35.7) | 210 (37.1) | 0.04 |
| Electronic vapor products (EVP)          | 38 (67.9) | 320 (62.7) | 358 (63.3) | 0.45 |
| Past 30-day use                          |           |            |            |      |
| Cigarettes                               | 12 (22.2) | 78 (15.3)  | 90 (16)    | 0.19 |
| Electronic vapor products (EVP)          | 18 (32.1) | 147 (28.8) | 165 (29.2) | 0.60 |
| Cigar/cigarillo/little cigar             | 2 (3.6)   | 31 (6.1)   | 33 (5.8)   | 0.45 |
| Smokeless tobacco                        | 3 (5.4)   | 5 (1)      | 8 (1.4)    | 0.01 |
| Hookah or waterpipe                      | 2 (3.6)   | 10 (2)     | 12 (2.1)   | 0.43 |
| Exposure to tobacco prevention campaigns |           |            |            |      |
| Real Cost                                | 44 (78.6) | 331 (64.9) | 375 (66.3) | 0.07 |
| truth                                    | 36 (64.3) | 280 (54.9) | 316 (55.8) | 0.40 |
| Unhyped                                  | 11 (19.6) | 107 (21)   | 118 (20.8) | 0.85 |

---

Table S2. Balance by study condition among those who completed follow-up, PACE Vape Messaging Study, 2020

|                              |                                        | Control<br>n (%) | Intervention<br>n (%) | Total<br>n (%) | p-value |
|------------------------------|----------------------------------------|------------------|-----------------------|----------------|---------|
| Sex                          |                                        |                  |                       |                | 0.86    |
|                              | Male                                   | 77 (31.8)        | 83 (31.1)             | 160 (31.4)     |         |
|                              | Female                                 | 165 (68.2)       | 184 (68.9)            | 349 (68.6)     |         |
| Cis or not cisgender         |                                        |                  |                       |                | 0.20    |
|                              | Cisgender                              | 232 (95.9)       | 250 (93.3)            | 482 (94.5)     |         |
|                              | Transgender/don't know/questioning     | 10 (4.1)         | 18 (6.7)              | 28 (5.5)       |         |
| Sexual identity              |                                        |                  |                       |                | 0.67    |
|                              | Straight/heterosexual                  | 173 (71.5)       | 187 (69.8)            | 360 (70.6)     |         |
|                              | Not straight/heterosexual              | 69 (28.5)        | 81 (30.2)             | 150 (29.4)     |         |
| Race/ethnicity               |                                        |                  |                       |                | 0.82    |
|                              | White                                  | 178 (73.6)       | 203 (75.7)            | 381 (74.7)     |         |
|                              | Non-white/other                        | 24 (9.9)         | 26 (9.7)              | 50 (9.8)       |         |
|                              | Hispanic                               | 40 (16.5)        | 39 (14.6)             | 79 (15.5)      |         |
| HRSA-Designated rural county |                                        |                  |                       |                | 0.71    |
|                              | No                                     | 119 (50.4)       | 135 (52.1)            | 254 (51.3)     |         |
|                              | Yes                                    | 117 (49.6)       | 124 (47.9)            | 241 (48.7)     |         |
| Employment status            |                                        |                  |                       |                | 0.17    |
|                              | Work full-time (35 hours/week or more) | 92 (38)          | 93 (34.7)             | 185 (36.3)     |         |
|                              | Work part-time (15-34 hours/week)      | 60 (24.8)        | 51 (19)               | 111 (21.8)     |         |
|                              | Work part-time (<15 hours/week)        | 34 (14)          | 51 (19)               | 85 (16.7)      |         |
|                              | Don't currently work for pay           | 56 (23.1)        | 73 (27.2)             | 129 (25.3)     |         |
| Subjective financial status  |                                        |                  |                       |                | 0.27    |
|                              | Live comfortably                       | 84 (34.7)        | 88 (32.8)             | 172 (33.7)     |         |
|                              | Meet needs with a little left          | 87 (36)          | 107 (39.9)            | 194 (38)       |         |
|                              | Just meet basic expenses               | 68 (28.1)        | 64 (23.9)             | 132 (25.9)     |         |
|                              | Don't meet basic expenses              | 3 (1.2)          | 9 (3.4)               | 12 (2.4)       |         |
| Ever use                     |                                        |                  |                       |                |         |
|                              | Cigarettes                             | 79 (32.6)        | 103 (38.4)            | 182 (35.7)     | 0.17    |
|                              | Electronic vapor products (EVP)        | 153 (63.2)       | 167 (62.3)            | 320 (62.7)     | 0.83    |
| Past 30-day use              |                                        |                  |                       |                |         |
|                              | Cigarettes                             | 31 (12.8)        | 47 (17.6)             | 78 (15.3)      | 0.13    |

|                                          |            |            |            |      |
|------------------------------------------|------------|------------|------------|------|
| Electronic vapor products (EVP)          | 66 (27.3)  | 81 (30.2)  | 147 (28.8) | 0.46 |
| Cigar/cigarillo/little cigar             | 16 (6.6)   | 15 (5.6)   | 31 (6.1)   | 0.63 |
| Smokeless tobacco                        | 5 (2.1)    | 0 (0)      | 5 (1)      | 0.02 |
| Hookah or waterpipe                      | 6 (2.5)    | 4 (1.5)    | 10 (2)     | 0.42 |
| Exposure to tobacco prevention campaigns |            |            |            |      |
| Real Cost                                | 145 (59.9) | 186 (69.4) | 331 (64.9) | 0.08 |
| truth                                    | 128 (52.9) | 152 (56.7) | 280 (54.9) | 0.33 |
| Unhyped                                  | 46 (19)    | 61 (22.8)  | 107 (21)   | 0.12 |

---
